# Supplementary material for: Highly Sensitive and Selective Nanogap-Enhanced SERS Sensing Platform
Source: Nanomaterials (Basel). 2019 Apr 16;9(4):619. doi: 10.3390/nano9040619 (PMC6523801; doi:10.3390/nano9040619)
Supplement: Supplementary file 1 [file nanomaterials-09-00619-s001.pdf]

## Supplementary Information

### Highly Sensitive and Selective Nanogap-Enhanced SERS Sensing Platform

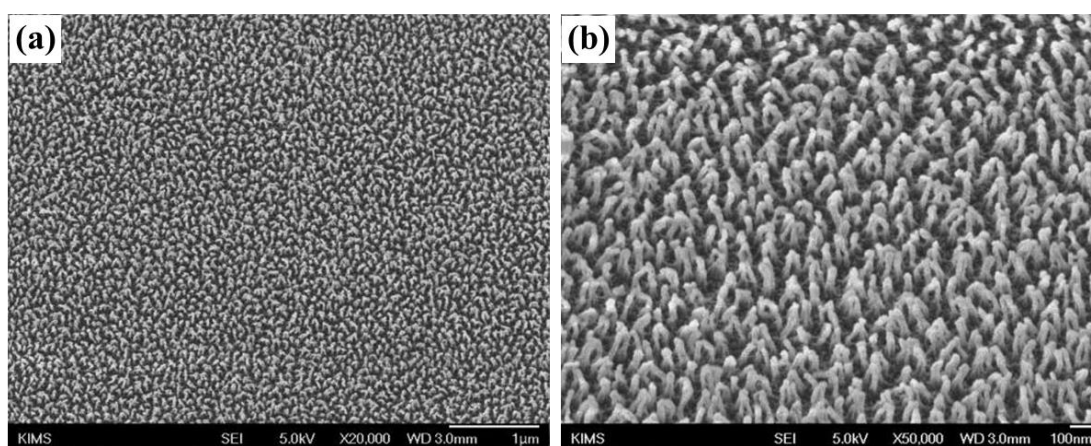

**Figure S1.** (a)–(b) FE-SEM images of the polyethylene terephthalate (PET) nanorods treated with an Ar plasma for 60 s.

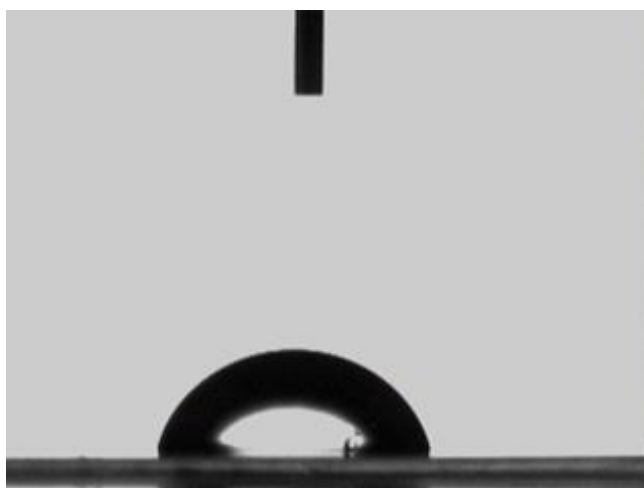

**Figure S2.** A water contact angle of  $72^\circ$  was obtained on the Ag/PET hybrid nanostructures.

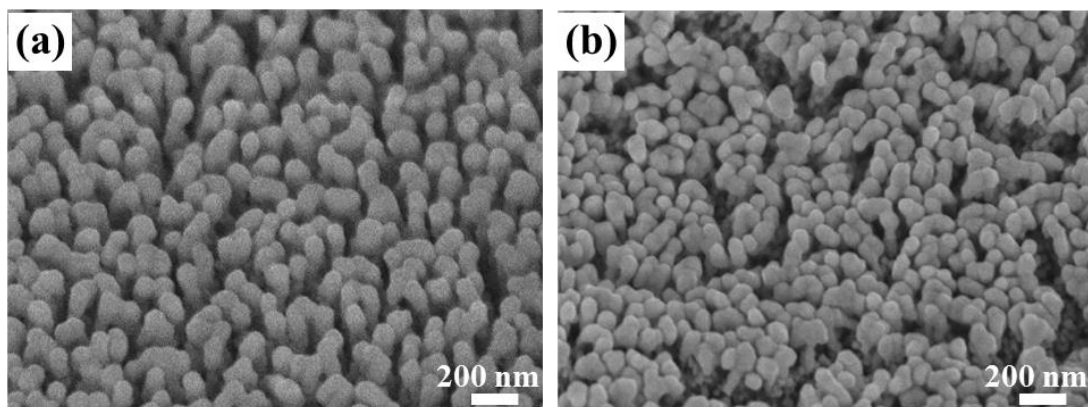

**Figure S3.** SEM images of (a) the non-leaning and (b) leaning Ag NPs.

#### - Enhancement Factor Calculation

The average enhancement factor (EF) of the SERS substrate was defined as

$$EF = (I_{SERS}/I_{Raman})^{(N_{Raman}/N_{SERS})}$$

where  $I_{SERS}$  is the SERS intensity of the probe molecules (in our case, benzenethiol (BT) molecules),  $I_{Raman}$  is the normal Raman intensity of BT,  $N_{SERS}$  is the number of BT molecules adsorbed onto the SERS substrate, and  $N_{Raman}$  is the number of BT molecules present in the Raman measurements.

#### - $I_{SERS}$ and $I_{Raman}$ Calculation

Based on the Raman intensity at  $1575\text{ cm}^{-1}$ ,  $I_{SERS}/I_{Raman}$  is  $2.9 \times 10^3$ .

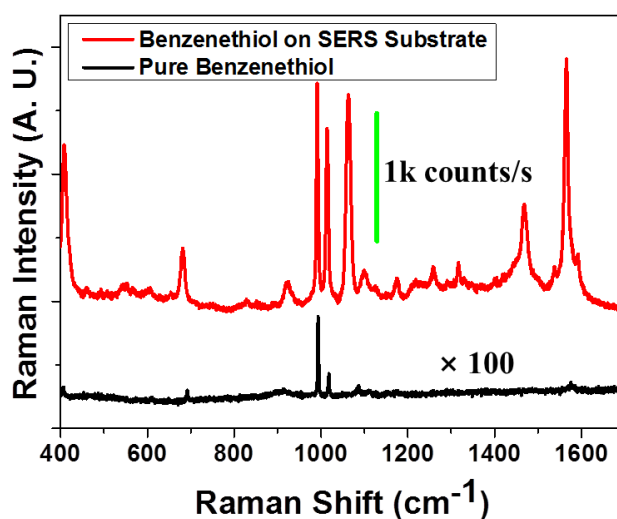

**Figure S4.** SERS spectrum measured from the benzenethiol monolayer-treated leaning Ag NPs (red line), and the normal Raman spectrum obtained from the pure benzenethiol solution (black line).

#### - $N_{SERS}$ and $N_{Raman}$ Calculation

We used a 50x objective lens to conduct the Raman measurements. The detection beam diameter was  $1.5\ \mu\text{m}$ , and the illumination area was  $1.86\ \mu\text{m}^2$ . The packing density of BT molecules across the Ag surface was  $6.8 \times 10^{14}\ \text{cm}^{-2}$ . The areal density of Ag NPs was  $53\ \mu\text{m}^{-2}$ . The surface area of the Ag NPs was calculated as follows. The Ag NPs were assumed to be  $100\ \text{nm}$  in diameter. Therefore, the SERS active surface area was about 1.66 times the value of a simple Ag flat layer. The value of  $N_{\text{SERS}}$  is the product of the packing density  $\times$  the surface area ratio (1.66), yielding  $2.1 \times 10^7$  molecules.  $N_{\text{Raman}}$  was calculated using the confocal volume ( $18.9\ \mu\text{m}^3$ ), BT density ( $1.08\ \text{g/mL}$ ), and molecular weight ( $110.18\ \text{g/mol}$ ), yielding a value of  $1.1 \times 10^{11}$  molecules. Therefore,  $N_{\text{Raman}}/N_{\text{SERS}}$  was  $5.2 \times 10^3$ .

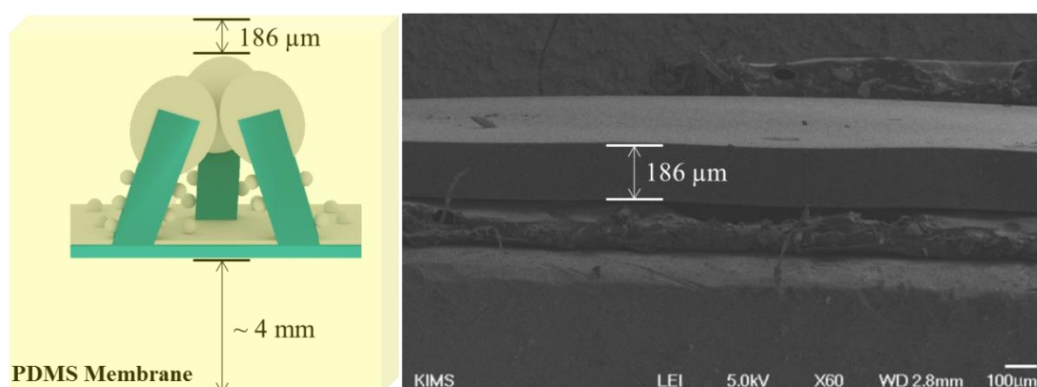

**Figure S5.** The SEM image indicated that the PDMS membrane was  $186\ \mu\text{m}$  thick.

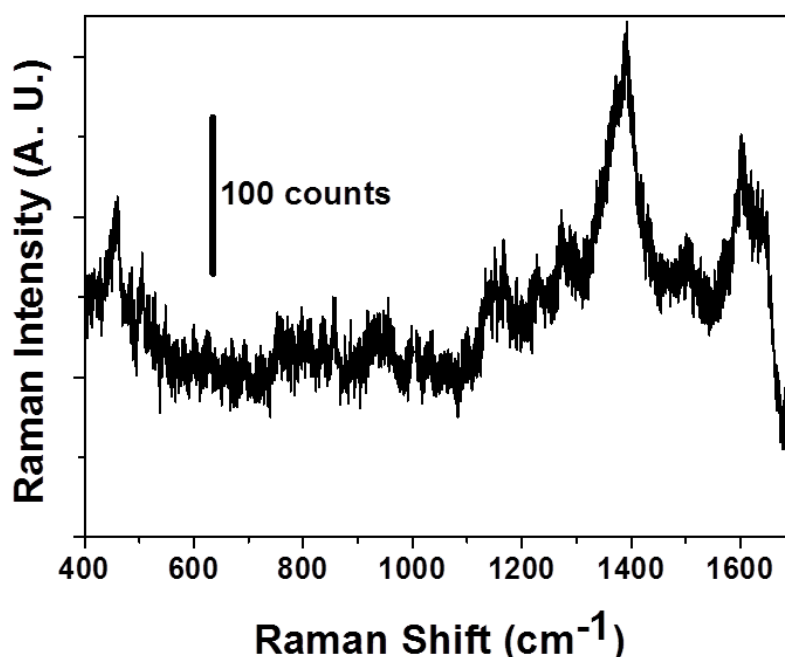

**Figure S6.** Raman spectrum obtained from the PDMS membrane. This spectrum was used to generate the red line in Figure 4a. A strong Raman shift related to the  $\text{CH}_3$  vibrational bands appeared near  $1400\ \text{cm}^{-1}$ .
